# Supplementary material for: An unfavorable body composition is common in early arthritis patients: A case control study
Source: PubMed Central journal article supplement (PMC5863963; doi:10.1371/journal.pone.0193377), 2018-03-22
Supplement: pone.0193377.s001.pdf [file pone.0193377.s001.pdf]

**S1 File. Linear regression analyses between traditional cardiovascular risk factors and body composition in early arthritis patients, stratified for gender and corrected for age, smoking status and NSAID use.**

Females, n=220

|                            | FMI                         | Percentages of fat distributed to the trunk | Android to gynoid fat mass ratio | ALMI                        |
|----------------------------|-----------------------------|---------------------------------------------|----------------------------------|-----------------------------|
|                            | B<br>(CI) and p-value       | B<br>(CI) and p-value                       | B<br>(CI) and p-value            | B<br>(CI) and p-value       |
| Systolic BP, mmHg‡         | 0.08<br>(0.04-0.13) <0.001* | 0.08<br>(0.03-0.13) 0.004*                  | <0.01<br>(0.00-0.00) 0.003*      | 0.01<br>(0.00-0.02) 0.004*  |
| Diastolic BP, mmHg‡        | 0.16<br>(0.10-0.23) <0.001* | 0.12<br>(0.04-0.21) 0.004*                  | <0.01<br>(0.00-0.01) 0.003*      | 0.02<br>(0.01-0.03) 0.008*  |
| Total Cholesterol, mmol/l† | -0.12<br>(-0.90-0.66) 0.759 | 1.18<br>(0.27-2.09) 0.012*                  | 0.03<br>(0.01-0.06) 0.003*       | -0.09<br>(-0.23-0.04) 0.168 |
| Triglycerides, mmol/l†     | 0.98<br>(-0.47-2.44) 0.182  | 4.06<br>(2.42-5.70) <0.001*                 | 0.12<br>(0.08-0.16) <0.001*      | -0.02<br>(-0.26-0.22) 0.847 |
| HDL, mmol/l†               | -2.37<br>(-4.2-0.61) 0.009* | -3.18<br>(-5.27- -1.01) 0.003*              | -0.09<br>(-0.14- -0.04) <0.001*  | -0.31<br>(-0.62-0.00) 0.050 |
| LDL, mmol/l†               | 0.31<br>(-0.54-1.17) 0.472  | 1.46<br>(0.47-2.45) 0.004*                  | 0.04<br>(0.02-0.06), 0.001*      | -0.03<br>(-0.18-0.12) 0.732 |
| TChol: HDL ratio†          | 0.38<br>(-0.25-1.01) 0.234  | 1.47<br>(0.76-2.19) <0.001*                 | 0.04<br>(0.02-0.06) <0.001*      | 0.03<br>(-0.08-0.13) 0.649  |

Males, n=97

|                             | FMI                         | Percentages of fat distributed to the trunk | Android to gynoid fat mass ratio | ALMI                        |
|-----------------------------|-----------------------------|---------------------------------------------|----------------------------------|-----------------------------|
|                             | B<br>(CI) and p-value       | B<br>(CI) and p-value                       | B<br>(CI) and p-value            | B<br>(CI) and p-value       |
| Systolic BP, mmHg ‡         | 0.06<br>(-0.01-0.12) 0.071  | 0.06<br>(-0.03-0.15) 0.182                  | <0.01<br>(0.00-0.01) 0.137       | 0.01<br>(-0.01-0.03) 0.168  |
| Diastolic BP, mmHg‡         | 0.14<br>(0.01-0.27) 0.040   | 0.10<br>(-0.09-0.29) 0.276                  | <0.01<br>(0.00-0.01) 0.240       | 0.02<br>(-0.01-0.05) 0.236  |
| Total Cholesterol, mmol/l † | 0.29<br>(-0.90-1.48) 0.630  | 2.01<br>(0.30-3.73) 0.022*                  | 0.07<br>(0.01-0.12) 0.013*       | -0.01<br>(-0.33-0.30) 0.929 |
| Triglycerides, mmol/l†      | 2.09<br>(0.27-3.91) 0.025*  | 5.81<br>(3.29-8.34) <0.001*                 | 0.15<br>(0.07-0.22) <0.001*      | -0.10<br>(-0.60-0.39) 0.677 |
| HDL, mmol/l†                | -3.11<br>(-6.22-0.01) 0.050 | -4.53<br>(-9.17-0.12) 0.056                 | -0.15<br>(-0.28- -0.01) 0.040    | -0.23<br>(-1.07-0.60) 0.577 |
| LDL, mmol/l†                | 0.55<br>(-0.86-1.95) 0.437  | 2.23<br>(0.24-4.21) 0.028                   | 0.08<br>(0.02-0.14) 0.007*       | 0.07<br>(-0.30-0.43) 0.723  |
| TChol: HDL ratio†           | 1.04<br>(0.25-1.82) 0.011*  | 1.96<br>(0.82-3.10) 0.001*                  | 0.06<br>(0.03-0.10) <0.001*      | 0.10<br>(-0.11-0.32) 0.351  |

ALMI: appendicular lean mass index, B: beta (1 point increase in blood pressure or lipid profile is X change in FMI, percentages of fat distributed to the trunk, android to gynoid fat mass ratio or LMI), BP: blood pressure, CI: confidence interval, FMI: fat mass index, HDL: high-density lipoprotein, LDL: low-density lipoprotein, mmHg: millimetre mercury, mmol/l: millimole/liter, NSAID: non-steroidal anti-inflammatory drugs, TChol: total cholesterol

‡Patients without antihypertensives

†Patients without statins

\*significant results at the 0.05 false discovery rate for 56 tests.
