# Supplementary material for: An unfavorable body composition is common in early arthritis patients: A case control study
Source: PubMed Central journal article supplement (PMC5863963; doi:10.1371/journal.pone.0193377), 2018-03-22
Supplement: pone.0193377.s002.pdf [file pone.0193377.s002.pdf]

**S2 File. Linear regression analyses between disease activity and body composition in early arthritis patients, stratified for gender and corrected for age and smoking status.**

|                                        | FMI                         | Percentages of fat distributed to the trunk | Android to gynoid fat mass ratio | ALMI                         |
|----------------------------------------|-----------------------------|---------------------------------------------|----------------------------------|------------------------------|
|                                        | B<br>(CI) and p-value       | B<br>(CI) and p-value                       | B<br>(CI) and p-value            | B<br>(CI) and p-value        |
| <i>Females, n=220</i>                  |                             |                                             |                                  |                              |
| ESR in mm/hour (median, IQR)           | 0.04<br>(0.00-0.07) 0.028   | 0.01<br>(-0.03-0.04) 0.797                  | <0.01<br>(0.00-0.00) 0.861       | <0.01<br>(0.00-0.01) 0.387   |
| DAS28 (mean, SD)                       | 0.33<br>(-0.17-0.83) 0.194  | -0.39<br>(-0.98-0.20) 0.190                 | -0.01<br>(-0.02-0.01) 0.343      | -0.01<br>(-0.10-0.081) 0.869 |
| SJC38 (median, IQR)                    | -0.09<br>(-0.20-0.01) 0.089 | -0.13<br>(-0.26- -0.01) 0.040               | <0.01<br>(-0.01-0.00) 0.030      | -0.01<br>(-0.03-0.01) 0.195  |
| TJC38 (median, IQR)                    | 0.06<br>(-0.03-0.15) 0.204  | -0.03<br>(-0.14-0.07) 0.534                 | <0.01<br>(0.00-0.00) 0.894       | <0.01<br>(-0.01-0.05) 0.403  |
| RF positive (n,%)                      | 0.44<br>(0.99-1.87) 0.546   | 0.43<br>(-1.27-2.13) 0.616                  | 0.02<br>(-0.02-0.06) 0.400       | 0.03<br>(-0.22-0.28) 0.812   |
| ACPA positive (n,%)                    | -0.04<br>(-1.49-1.42) 0.963 | 0.89<br>(-0.83-2.61) 0.310                  | 0.02<br>(-0.02-0.06) 0.389       | -0.07<br>(-0.33-0.19) 0.238  |
| HAQ-DI (median, IQR)                   | 0.99<br>(-0.01-1.98) 0.052  | -0.92<br>(-2.08-0.24) 0.120                 | -0.01<br>(-0.04-0.02) 0.387      | 0.04<br>(-0.14-0.22) 0.654   |
| Symptom duration, months (median, IQR) | 0.01<br>(0.00-0.02) 0.068   | 0.01<br>(0.00-0.03) 0.020                   | <0.01<br>(0.00-0.00) 0.478       | <0.01<br>(0.00-0.00) 0.068   |
| <i>Males, n=97</i>                     |                             |                                             |                                  |                              |
| ESR in mm/hour (median, IQR)           | <0.01<br>(-0.04-0.04) 0.969 | -0.04<br>(-0.09-0.02) 0.173                 | <0.01<br>(0.00-0.00) 0.615       | <0.01<br>(-0.01-0.01) 0.543  |
| DAS28 (mean, SD)                       | 0.48<br>(-0.15-1.10) 0.132  | -0.10<br>(-1.02-0.83) 0.834                 | <0.01<br>(-0.03-0.03) 0.935      | 0.03<br>(-0.13-0.19) 0.694   |
| SJC38 (median, IQR)                    | 0.05<br>(-0.06-0.17) 0.365  | <0.01<br>(-0.17-0.17) 0.998                 | <0.01<br>(-0.01-0.00) 0.486      | 0.02<br>(-0.01-0.05) 0.189   |
| TJC38 (median, IQR)                    | 0.10<br>(0.00-0.21) 0.204   | -0.02<br>(-0.17-0.14) 0.844                 | <0.01<br>(-0.01-0.00) 0.655      | 0.02<br>(-0.01-0.05) 0.134   |
| RF positive (n,%)                      | 1.04<br>(-0.79-2.88) 0.261  | -2.24<br>(-4.90-0.43) 0.098                 | -0.04<br>(-0.12-0.04) 0.352      | 0.36<br>(-0.11-0.82) 0.132   |
| ACPA positive (n,%)                    | -0.20<br>(-2.06-1.65) 0.829 | -2.04<br>(-4.72-0.64) 0.135                 | -0.07<br>(-0.15-0.02) 0.109      | -0.16<br>(-0.63-0.32) 0.511  |
| HAQ-DI (median, IQR)                   | 0.52<br>(-0.76-1.79) 0.422  | 0.18<br>(-1.62-1.98) 0.841                  | 0.02<br>(-0.03-0.08) 0.443       | 0.05<br>(-0.27-0.37) 0.761   |
| Symptom duration, months (median, IQR) | 0.04<br>(0.00-0.07) 0.044   | 0.01<br>(-0.04-0.06) 0.744                  | <0.01<br>(0.00-0.00) 0.478       | 0.01<br>(0.00-0.02) 0.024    |

ACPA: anti-citrullinated protein antibody, ALMI: appendicular lean mass index, B: beta (1 point increase in parameters of disease activity is X change in FMI, percentages of fat distributed to the trunk, android to gynoid fat mass ratio or LMI), CI: confidence interval, DAS28: disease activity score of 28 joints, ESR: erythrocyte sedimentation rate, FMI: fat mass index, HAQ-DI: health assessment questionnaire disability index, mm/hour: millimetre/hour, n:number, RF: rheumatoid factor, SJC38: swollen joint count of 38 joints, TJC38: tender joint count of 38 joints

\*significant results at the 0.05 false discovery rate for 64 tests.
